# Supplementary material for: Effect of fluorine substitution in organoboron electron acceptors for photovoltaic application
Source: Royal Society of Chemistry journal article supplement (doi:10.1039/c9qo00286c), 2019-01-01
Supplement: c9qo00286c1.pdf [file c9qo00286c1.pdf]

# Supporting Information

*for*

## **Effect of Fluorine Substitution in Organoboron Electron Acceptors for Photovoltaic Application**

Fangbin Liu, Jun Liu\* and Lixiang Wang

State Key Laboratory of Polymer Physics and Chemistry, Changchun Institute of Applied Chemistry, Chinese Academy of Sciences, Changchun 130022, People's Republic of China.

E-mail: [liujun@ciac.ac.cn](mailto:liujun@ciac.ac.cn)

### **Contents**

- 1. PSC device fabrication and measurements**
- 2. Thermal property**
- 3. DFT calculation results**
- 4. Charge mobility measurements**
- 5.  $J_{sc}$  versus light intensity and  $J_{ph}$  versus effective voltage**
- 6.  $^1\text{H}$  NMR,  $^{13}\text{C}$  NMR and mass spectra**

## 1. PSC device fabrication and measurements

OSC device was fabricated with an architecture of indium tin oxide (ITO)/poly(3,4-ethylenedioxythiophene) doped with polystyrene sulfonate (PEDOT:PSS)/active layer/Ca/Al. Patterned ITO glass substrates were cleaned by sequential ultrasonication in detergent, deionized water, acetone, and isopropyl alcohol, followed by heating at 120 °C for 30 min and treating with UV-ozone for 30 min. PEDOT:PSS (Baytron PVP A14083) was spin-coated on the ITO substrates at a speed of 5000 rpm for 40 s to give a thickness of 40 nm, and then baked at 120 °C for 30 min. The active layers were spin-coated from the solution of PBDB-T:MBN, PBDB-T:MBN-F1 and PBDB-T:MBN-F2 with a donor:acceptor ratio of 1:1 (*w/w*) in chlorobenzene (20 mg mL<sup>-1</sup>). The active layer was annealed at 100 °C for 10 minutes in N<sub>2</sub> atmosphere. Finally, the device was transferred to a vacuum chamber, and Ca (20 nm)/Al (100 nm) was sequentially deposited by thermal evaporation at the pressure of about 2×10<sup>-4</sup> Pa. The active area of each device was 8.0 mm<sup>2</sup>.

The current density (*J-V*) curves of the OSC devices were measured using a computer-controlled Keithley 2400 source meter under 100 mW cm<sup>-2</sup> AM 1.5G simulated solar light illumination provided by a XES-40S2-CE Class Solar Simulator (Japan, SAN-EI Electric Co., Ltd.). The EQE was measured using a Solar Cell Spectral Response Measurement System QE-R3011 (Enlitech Co., Ltd.), which was calibrated with a crystal silicon photovoltaic cell before use.

## 2. Thermal property

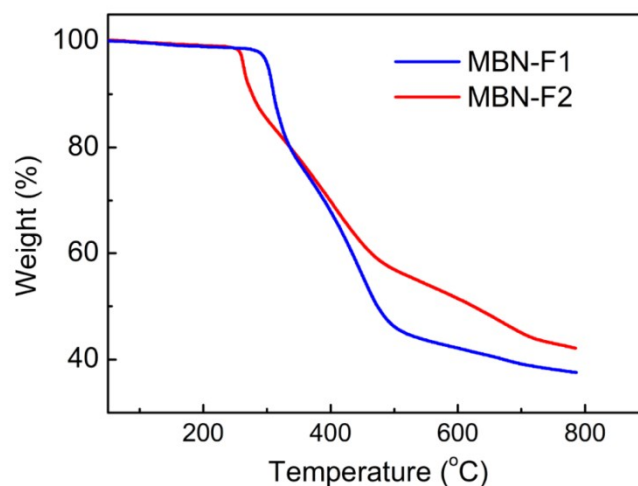

Figure S1. TGA curves of MBN-F1 and MBN-F2.

Thermogravimetric analysis (TGA) was performed to investigate thermal properties of **MBN-F1** and **MBN-F2** in N<sub>2</sub> flow. As shown in Figure S1, **MBN-F1** and **MBN-F2** exhibit good thermal stability with thermal decomposition temperature ( $T_d$ ) at 302 and 264 °C for 5% weight loss at heating rate of 20 °C/min.

### 3. DFT calculation results

All calculations were carried out using Gaussian 09. The geometry structures of **MBN-F1**, **MBN-F2** and two other fluorinated molecules were optimized by using DFT calculations (B3LYP/6-31G(d,p)) and the alkyl chains have been replaced by methyl for clarity. One fluorinated molecule possesses pentafluorophenyl substituent on the organoboron core unit. The other one is an eight-fold fluorinated **MBN**-derivative (both at the organoboron core unit and at the endcapping groups).

| Molecule      | Chemical structure | LUMO | HOMO |
|---------------|--------------------|------|------|
| <b>MBN</b>    |                    |      |      |
| <b>MBN-F1</b> |                    |      |      |
| <b>MBN-F2</b> |                    |      |      |
| <b>MBN-F3</b> |                    |      |      |
| <b>MBN-F4</b> |                    |      |      |

**Figure S2.** The chemical structures and Kohn–Sham LUMOs and HOMOs of **MBN**, **MBN-F1**, **MBN-F2** and two other fluorinated molecules.

Time-dependent DFT (TD-DFT) calculations were performed at the B3LYP/6-

31G(d) level of theory to elucidate the absorption spectra of MBN-F1 and MNB-F2. The  $S_0 \rightarrow S_n$  transitions of TD-DFT calculation were then performed based on the optimized structure at ground state. The TD-DFT calculation results were as follows.

(1) Excitation energies and oscillator strengths of **MBN-F1** (oscillator strength exceeding 0.1):

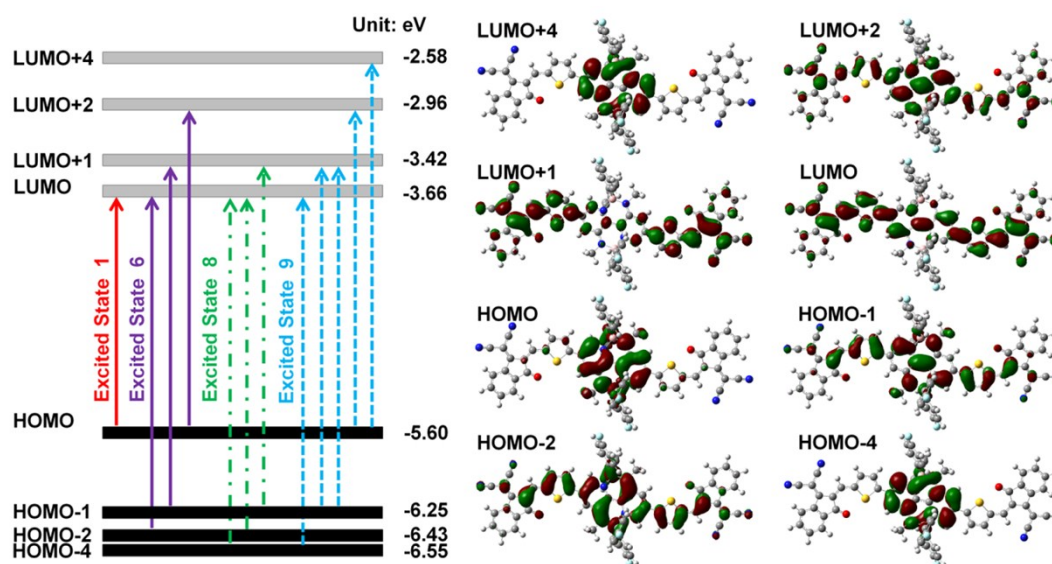

**Figure S3.** Schematic diagrams showing the main orbital configurations and electronic transitions (oscillator strength exceeding 0.2) of **MBN-F1** based on the TD-DFT calculation.

**Excited State 1:** Energy: 1.6439 eV Wavelength: 754.23 nm Oscillator strength: 0.5821 Configurations:

HOMO  $\rightarrow$  LUMO 0.70407

**Excited State 4:** Energy: 2.3327 eV Wavelength: 531.51 nm Oscillator strength: 0.1303 Configurations:

HOMO  $\rightarrow$  LUMO+2 0.68557

HOMO  $\rightarrow$  LUMO+4 -0.12704

**Excited State 6:** Energy: 2.5220 eV Wavelength: 491.61 nm Oscillator strength: 0.8547 Configurations:

HOMO-2  $\rightarrow$  LUMO -0.36842

HOMO-1  $\rightarrow$  LUMO+1 0.58239

HOMO  $\rightarrow$  LUMO+4 -0.10381

**Excited State 8:** Energy: 2.5347 eV Wavelength: 489.14 nm Oscillator

strength: 0.2255 Configurations:

|               |         |
|---------------|---------|
| HOMO-4→LUMO   | 0.26853 |
| HOMO-2→LUMO   | 0.52383 |
| HOMO-1→LUMO+1 | 0.36807 |

**Excited State 9:** Energy: 2.6108 eV Wavelength: 474.88 nm Oscillator strength: 0.2280 Configurations:

|               |          |
|---------------|----------|
| HOMO-4→LUMO   | -0.45873 |
| HOMO-2→LUMO   | 0.10677  |
| HOMO-1→LUMO+1 | 0.12431  |
| HOMO→LUMO+2   | 0.12056  |
| HOMO→LUMO+4   | 0.48420  |

Excited State 10: Energy: 2.6445 eV Wavelength: 468.83 nm Oscillator strength: 0.1228 Configurations:

|             |          |
|-------------|----------|
| HOMO-6→LUMO | -0.26625 |
| HOMO-4→LUMO | 0.41977  |
| HOMO-2→LUMO | -0.20559 |
| HOMO→LUMO+4 | 0.43845  |

Excited State 12: Energy: 2.7189 eV Wavelength: 456.01 nm Oscillator strength: 0.1913 Configurations:

|             |          |
|-------------|----------|
| HOMO-6→LUMO | 0.64005  |
| HOMO-4→LUMO | 0.16082  |
| HOMO-2→LUMO | -0.15182 |
| HOMO→LUMO+4 | 0.16120  |

Excited State 25: Energy: 3.1177 eV Wavelength: 397.68 nm Oscillator strength: 0.1877 Configurations:

|                |          |
|----------------|----------|
| HOMO-15→LUMO+1 | -0.21714 |
| HOMO-15→LUMO+3 | -0.15098 |
| HOMO-14→LUMO   | 0.33947  |
| HOMO-14→LUMO+4 | 0.10855  |
| HOMO-7→LUMO+1  | 0.32247  |
| HOMO-5→LUMO+1  | -0.18539 |

|               |          |
|---------------|----------|
| HOMO-2→LUMO+2 | -0.16728 |
| HOMO-1→LUMO+3 | 0.33633  |

The above results indicate that the short-wavelength absorption band of **MBN-F1** is mainly attributed to the HOMO-4→LUMO, HOMO-2→LUMO, HOMO-1→LUMO+1, HOMO→LUMO+2, HOMO→LUMO+4 transitions (illustrated by excited state 6, 8 and 9 in Figure S3). The long-wavelength absorption band of **MBN-1** is mainly attributed to the HOMO→LUMO transition.

(2) Excitation energies and oscillator strengths of **MBN-F2** (oscillator strength exceeding 0.1):

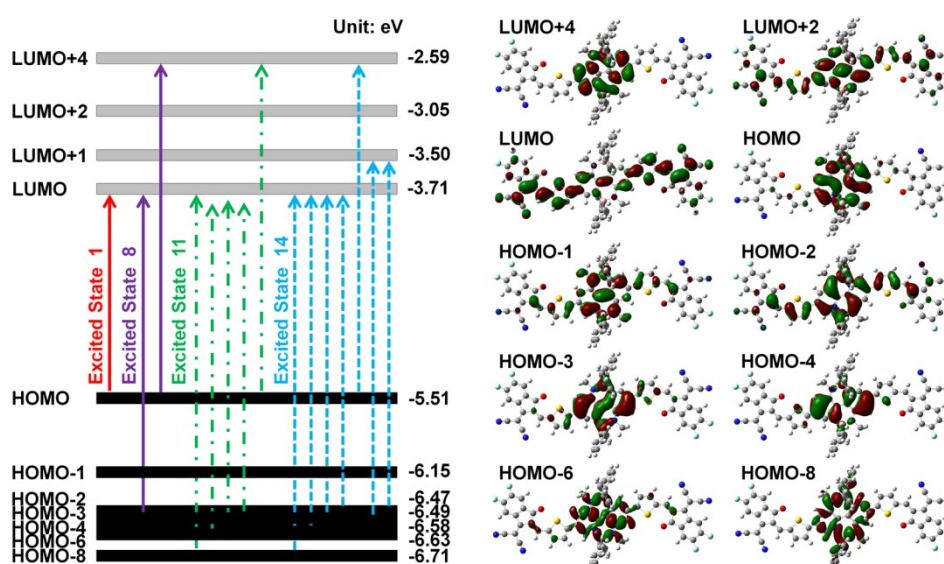

**Figure S4.** Schematic diagrams showing the main orbital configurations and electronic transitions (oscillator strength exceeding 0.2) of **MBN-F2** based on the TD-DFT calculation.

**Excited State 1:** Energy: 1.4671 eV Wavelength: 845.12 nm Oscillator strength: 0.4882 Configurations:

|           |         |
|-----------|---------|
| HOMO→LUMO | 0.70473 |
|-----------|---------|

**Excited State 6:** Energy: 2.2732 eV Wavelength: 545.41 nm Oscillator strength: 0.1745 Configurations:

|               |         |
|---------------|---------|
| HOMO-1→LUMO+1 | 0.70079 |
|---------------|---------|

**Excited State 8:** Energy: 2.4444 eV Wavelength: 507.22 nm Oscillator strength: 0.6059 Configurations:

|             |          |
|-------------|----------|
| HOMO-3→LUMO | -0.42627 |
|-------------|----------|

HOMO→LUMO+4 0.54410

**Excited State 11:** Energy: 2.5668 eV Wavelength: 483.04 nm Oscillator strength: 0.3235 Configurations:

HOMO-8→LUMO 0.19346  
HOMO-6→LUMO 0.36813  
HOMO-4→LUMO 0.52451  
HOMO-3→LUMO -0.15758  
HOMO→LUMO+4 -0.12102

**Excited State 12:** Energy: 2.5882 eV Wavelength: 479.04 nm Oscillator strength: 0.1864 Configurations:

HOMO-8→LUMO -0.20366  
HOMO-6→LUMO 0.58516  
HOMO-4→LUMO -0.26361  
HOMO-3→LUMO 0.14831  
HOMO→LUMO+4 0.11000

**Excited State 14:** Energy: 2.6558 eV Wavelength: 466.84 nm Oscillator strength: 0.4426 Configurations:

HOMO-8→LUMO 0.62339  
HOMO-4→LUMO -0.21257  
HOMO-3→LUMO 0.12129  
HOMO-2→LUMO 0.12520  
HOMO→LUMO+4 0.11556  
HOMO-3→LUMO+1 0.64219  
HOMO-2→LUMO+1 -0.13744

The above results indicate that the short-wavelength absorption band of **MBN-F2** is mainly attributed to the HOMO-8→LUMO, HOMO-6→LUMO, HOMO-4→LUMO, HOMO-3→LUMO, HOMO-3→LUMO+1, HOMO-2→LUMO, HOMO-1→LUMO+1, HOMO→LUMO+2, HOMO→LUMO+4 transitions (illustrated by excited state 8, 11 and 14 in Figure S4). The long-wavelength absorption band of MBN-1 is mainly attributed to the HOMO→LUMO transition.

#### 4. Charge mobility measurement

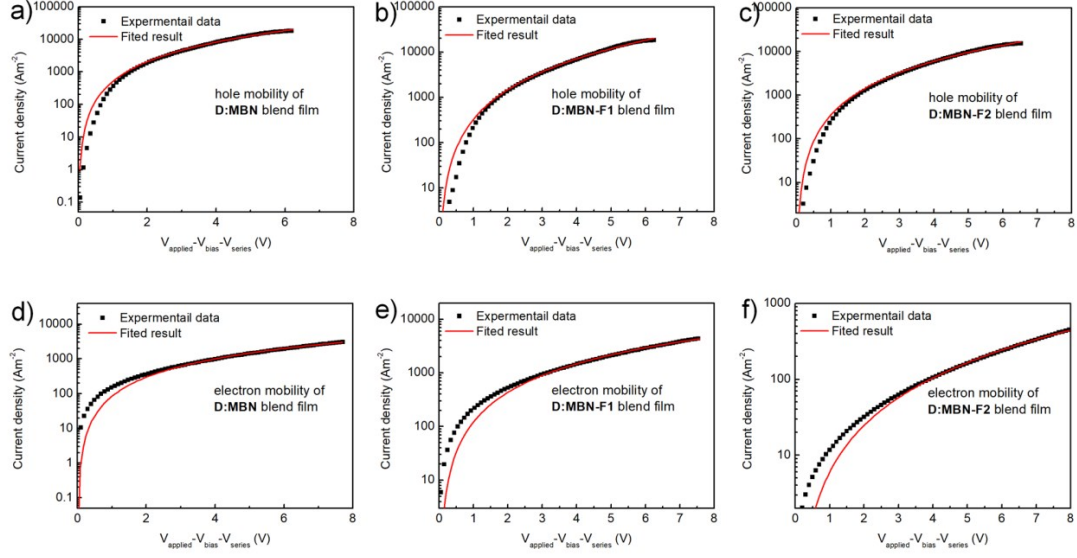

**Figure S5.**  $J$ - $V$  curves and SCLC fitting of the hole-only device (a, b and c) and electron-only device (d, e and f) of the blend films based on PBDB-T:MBN, PBDB-T:MBN-F1 and PBDB-T:MBN-F2.

Charge mobilities of the blend films based on PBDB-T:MBN, PBDB-T:MBN-F1 and PBDB-T:MBN-F2 were measured based on the space-charge-limited current (SCLC) method based on the  $J$ - $V$  curves of the hole-only device (ITO/PEDOT:PSS/active layer/Al) and electron-only device (ITO/PEIE/active layer/Ca/Al). The  $J$ - $V$  curves in the range of 0-10 V were recorded and fitted to a space-charge-limited function:

$$J = \frac{9\varepsilon_0\varepsilon_r\mu_0V^2}{8L^3} \exp\left(0.89\beta\sqrt{\frac{V}{L}}\right) \quad (1)$$

where  $J$  is the current density,  $L$  is the film thickness of the active layer,  $\mu_0$  is the charge mobility,  $\varepsilon_r$  is the relative dielectric constant of the transport medium,  $\varepsilon_0$  is the permittivity of free space,  $V$  ( $V_{\text{appl}} - V_{\text{bi}}$ ) is the internal voltage in the device, where  $V_{\text{appl}}$  is the applied voltage to the device and  $V_{\text{bi}}$  is the built-in voltage due to the relative work function difference of the two electrodes.  $\beta$  is the field-activation factor.

The hole mobilities of the active layers are  $1.11 \times 10^{-4} \text{ cm}^2 \text{ V}^{-1} \text{ s}^{-1}$  for MBN,  $1.07 \times 10^{-4} \text{ cm}^2 \text{ V}^{-1} \text{ s}^{-1}$  for MBN-F1 and  $1.42 \times 10^{-4} \text{ cm}^2 \text{ V}^{-1} \text{ s}^{-1}$  for MBN-F2. The electron mobilities of the active layers are  $1.88 \times 10^{-5} \text{ cm}^2 \text{ V}^{-1} \text{ s}^{-1}$  for MBN,  $2.71 \times 10^{-5} \text{ cm}^2 \text{ V}^{-1} \text{ s}^{-1}$  for MBN-F1 and  $2.40 \times 10^{-6} \text{ cm}^2 \text{ V}^{-1} \text{ s}^{-1}$  for MBN-F2.

## 5. $J_{\text{sc}}$ versus light intensity and $J_{\text{ph}}$ versus effective voltage



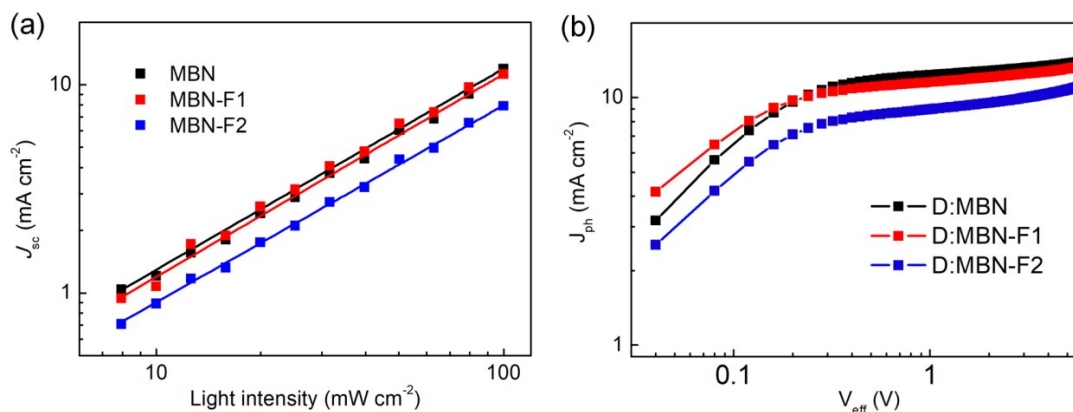

**Figure S6.** (a) Dependence of  $J_{sc}$  on illuminated light intensity dependence and (b) photocurrent versus effective voltage ( $V_{eff}$ ) for the OSCs based on PBDB-T:MBN, PBDB-T:MBN-F1 and PBDB-T:MBN-F2.

To gain more insight into the charge-recombination mechanism and exciton dissociation processes occurring in the device, we investigate the  $J_{sc}$  as a function of light intensity ( $P$ ) and exciton dissociation probabilities, and the corresponding fitting results are shown in Figure S6. The  $J_{sc}$  as a function of illuminated light intensity was performed by varying light intensity from 1 to 100 mW cm<sup>-2</sup>, and the corresponding equation is described as  $J_{sc} \propto P^\alpha$ , where  $\alpha$  is the slope of the lines in logarithmic scale. If  $\alpha$  is equal to or approximates to 1, it indicates there is the negligible bimolecular recombination in the device at the short circuit condition. As shown in Figure S6a, the values of **MBN**, **MBN-F1**, and **MBN-F2**-based devices were estimated to be 0.967, 0.973 and 0.946. The results suggest that the **MBN-F2**-based device has more bimolecular charge recombination under short-circuit conditions than that of the other two devices. In addition, as shown in Figure S6b, the exciton dissociation probability of PBDB-T:**MBN** based device is 76.4%, which is much higher than that of PBDB-T:**MBN-F1** based device (75.6%) and PBDB-T:**MBN-F2** based device (66.7%). The charge carrier generation/collection efficiency of three devices are relatively low (<80%), indicating possible inefficient exciton dissociation.

## 6. <sup>1</sup>H NMR, <sup>13</sup>C NMR and mass spectra

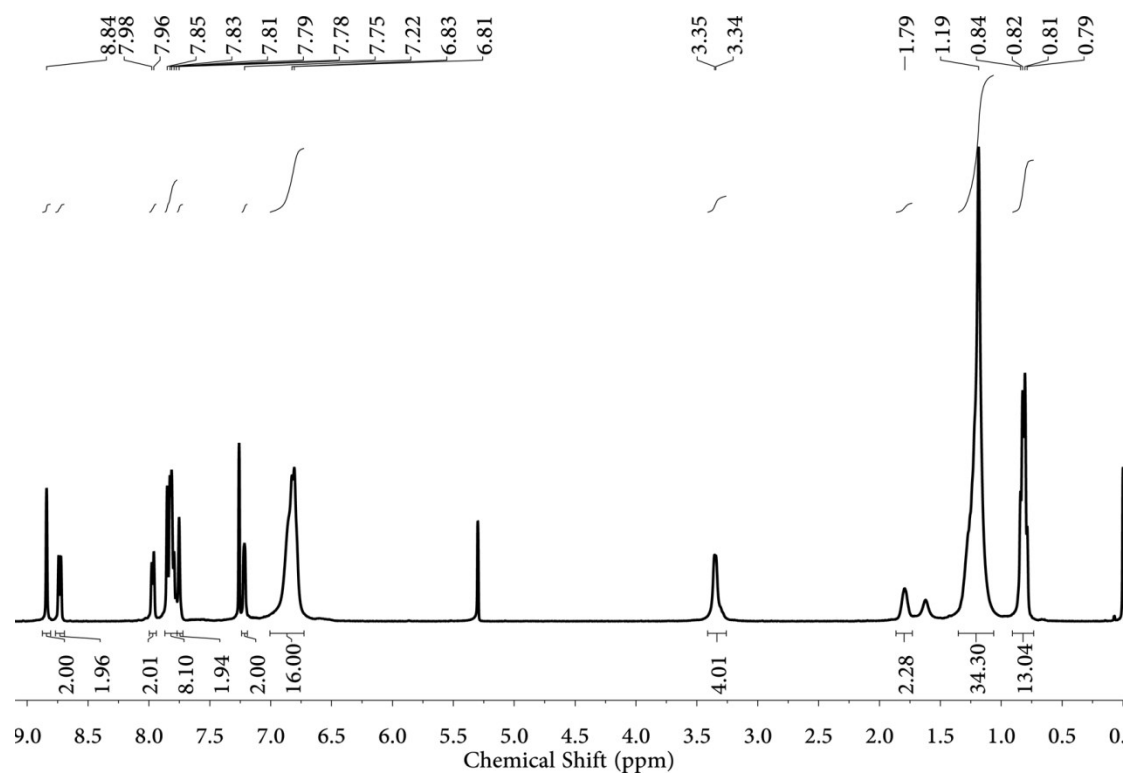

Figure S7. <sup>1</sup>H NMR spectrum of MBN-F1.

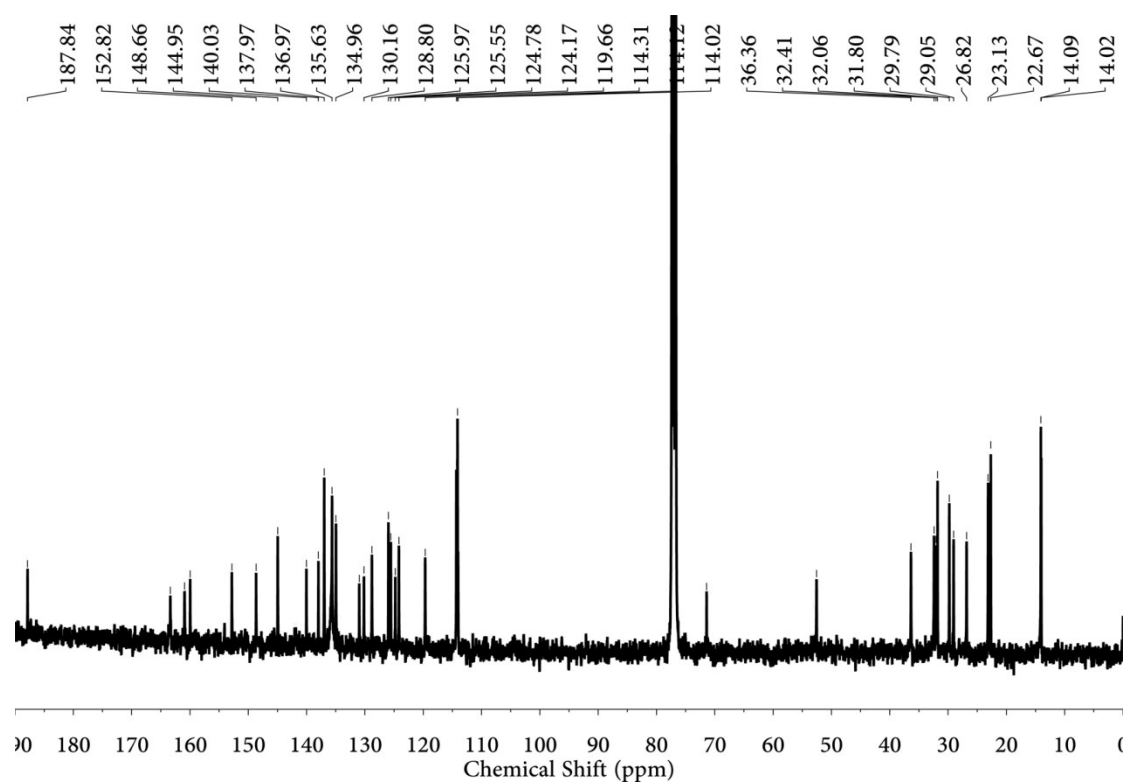

Figure S8. <sup>13</sup>C NMR spectrum of MBN-F1.

Comment 1 DCTB

Comment 2

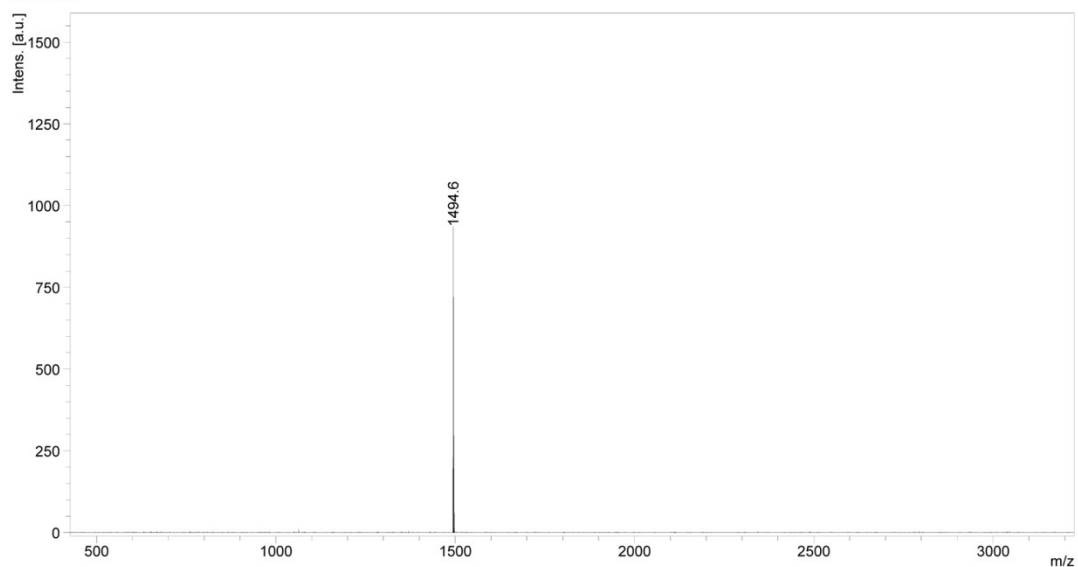

Bruker Daltonics flexAnalysis

printed: 6/14/2018 4:47:19 PM

**Figure S9.** MALDI-TOF mass spectrum of MBN-F1.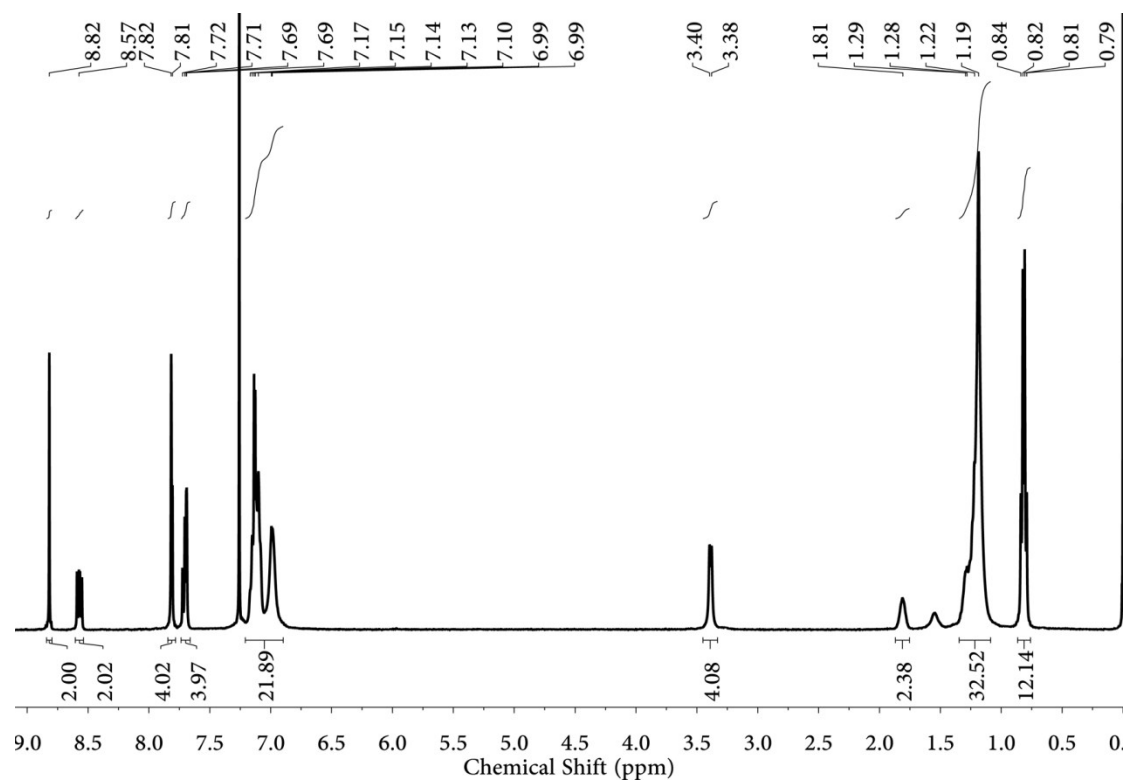**Figure S10.** <sup>1</sup>H NMR spectrum of MBN-F2.

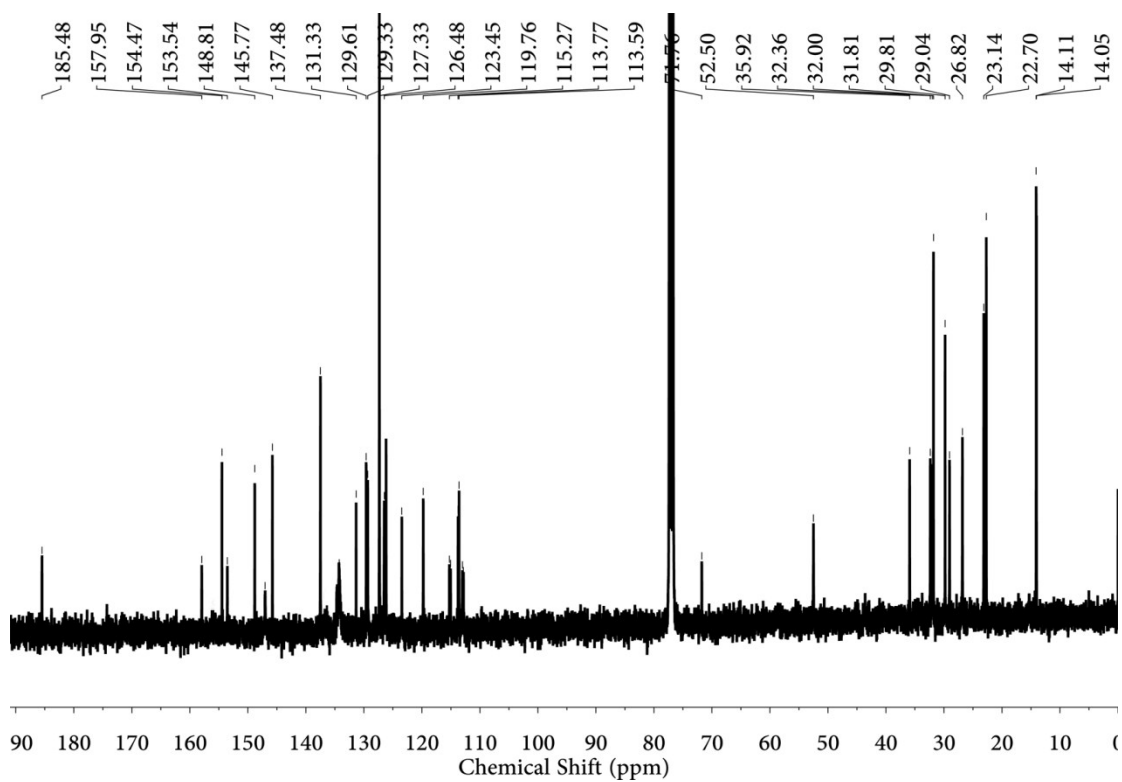

Figure S11. <sup>13</sup>C NMR spectrum of MBN-F2.

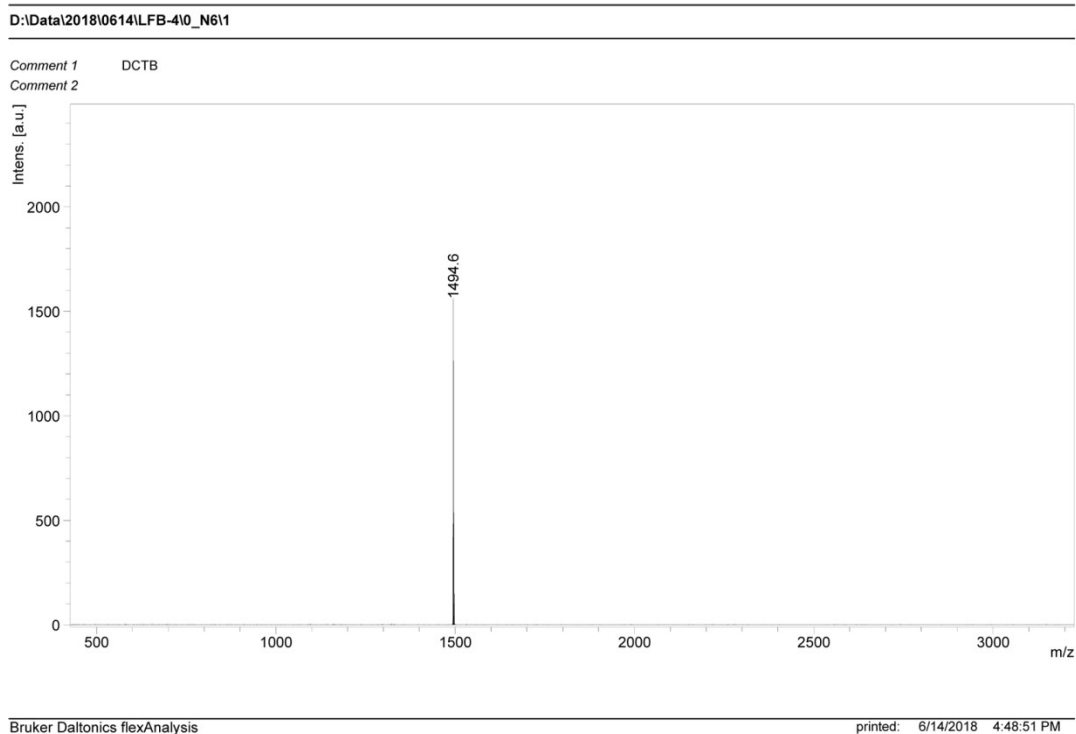

Figure S12. MALDI-TOF mass spectrum of MBN-F2.
